# Supplementary material for: Renewable Resources and a Recycled Polymer as Raw Materials: Mats from Electrospinning of Lignocellulosic Biomass and PET Solutions
Source: PubMed Central journal article supplement (PMC6415374; doi:10.3390/polym10050538), 2018-05-17
Supplement: polymers-10-00538-s001.pdf [file polymers-10-00538-s001.pdf]

## Supplementary Material:

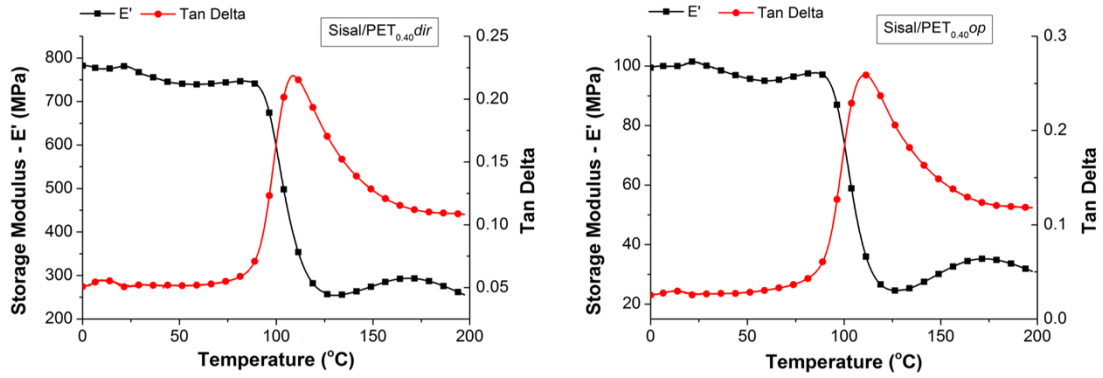

Figure S1: DMA curves of Sisal/PET<sub>0.40</sub> (*dir and op*)

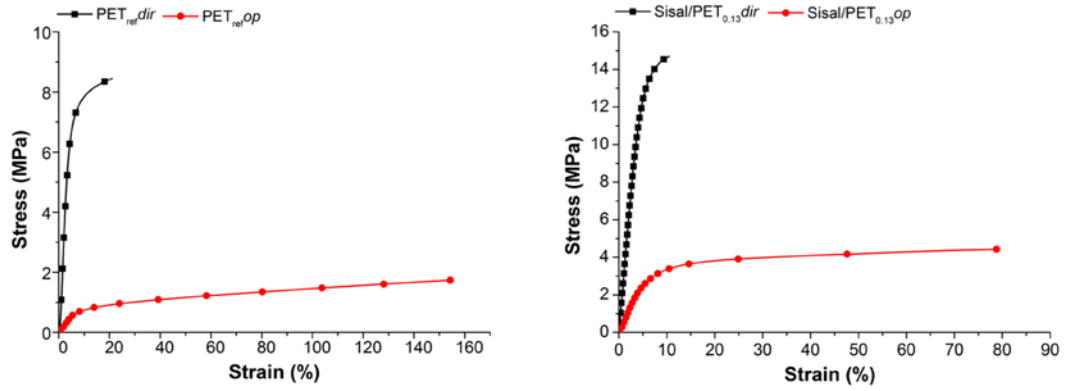

Figure S2: Tensile strength curves of PET<sub>ref</sub> and Sisal/PET<sub>0.40</sub> (*dir and op*)

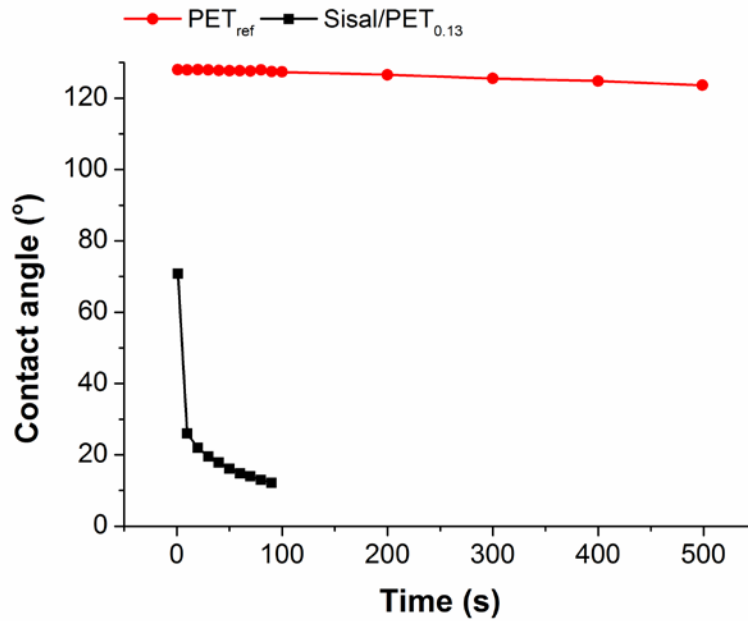

Figure S3: Contact angle curves of PET<sub>ref</sub> and Sisal/PET<sub>0.13</sub>.
